# Supplementary material for: Course of Chronic Trypanosoma cruzi Infection after Treatment Based on Parasitological and Serological Tests: A Systematic Review of Follow-Up Studies
Source: PubMed Central journal article supplement (PMC4593559; doi:10.1371/journal.pone.0139363), 2015-10-05
Supplement: pone.0139363.s009.pdf [file pone.0139363.s009.pdf]

| Source                                    | Country                      | Study design | Age at treatment  | Study groups                                                                                                      | Duration of follow-up | Parasitological endpoints | Serological endpoints <sup>1</sup>      |
|-------------------------------------------|------------------------------|--------------|-------------------|-------------------------------------------------------------------------------------------------------------------|-----------------------|---------------------------|-----------------------------------------|
| <i>Aguiar et al., 2012</i> [33]           | Brazil                       | Cohort       | Adults            | BNZ (n=29):<br>5 mg/kg/d for 60 days<br><br>Control (n=10):<br>no treatment                                       | 1-29 y                | HC, Nested PCR, XD        | IIF <sup>2</sup> , ELISA <sup>2</sup>   |
| <i>Britto et al., 2001</i> [58]           | Brazil                       | Cohort       | Children & adults | BNZ (n=26):<br>5-6 mg/kg/d for 30-60 days<br><br>NFTX (n=27):<br>7-8 mg/kg/d for 60-90 days<br><br>Placebo (n=15) | 20 y (mean)           | PCR, XD                   | Not reported                            |
| <i>Silveira et al., 2000</i> [62]         |                              |              | Children          | BNZ (n=10):<br>5-7 mg/kg/d for 60 days<br><br>NFTX (n=2):<br>7-8 mg/kg/d for 60-90 days                           | 8 & 20 y              |                           | ELISA, IHA, IIF                         |
| <i>Cancado et al., 1976</i> [72]          | Brazil                       | Cohort       | Children & adults | NFTX (n=15):<br>10 mg/kg/d for 60-120 days<br><br>Placebo (n=5)                                                   | 2 y                   | XD                        | CF, HA, IF                              |
| <i>Cancado, 2002</i> [57]                 | Brazil                       | Cohort       | Children & adults | BNZ (n=113):<br>5-10 mg/kg/d for 40 days                                                                          | 6-18 y                | Not reported              | CF, HA, IF, ELISA                       |
| <i>Cerisola et al., 1977</i> [71]         | Argentina<br>Brazil<br>Chile | Cohort       | Adults            | NFTX (n=109):<br>8-10 mg/kg/d for 60-120 days<br><br>Control (n=30):<br>no treatment                              | 11 mo                 | XD                        | Not reported                            |
| <i>Coura et al., 1997</i> [26]            | Brazil                       | RCT          | Adults            | BNZ (n=26):<br>5 mg/kg/d for 30 days<br><br>NFTX (n=27):<br>5 mg/kg/d for 30 days<br><br>Placebo (n=24)           | 12 mo                 | XD                        | CF, IF                                  |
| <i>de Andrade et al., 1996</i> [27]       | Brazil                       | RCT          | Children          | BNZ (n=64):<br>7.5 mg/kg/d for 60 days<br><br>Placebo (n=65)                                                      | 3 y                   | Not reported              | AT-ELISA <sup>3</sup> , ELISA, IHA, IIF |
| <i>Galvão et al., 2003</i> [24]           |                              |              |                   | BNZ (n=58)                                                                                                        |                       | PCR                       | Not reported                            |
| <i>Andrade et al., 2004</i> [23]          |                              |              |                   | Placebo (n=53)                                                                                                    | 6 y                   | Not reported              | AT-ELISA <sup>3</sup>                   |
| <i>de Castro et al., 2006</i> [48]        | Brazil                       | Cohort       | Adults            | BNZ (n=27):<br>5 mg/kg/d for 60 days<br><br>Control (n=13):<br>no treatment                                       | 24 mo                 | HC                        | Not reported                            |
| <i>de Lana et al., 2009</i> [40]          | Brazil                       | Cohort       | Children & adults | BNZ (n=28):<br>5-10 mg/kg/d for 40-60 days                                                                        | 9 y                   | HC, PCR                   | ELISA, FC-ALTA-IgG ELISA <sup>3</sup>   |
| <i>Machado-de-Assis et al., 2013</i> [30] |                              |              |                   |                                                                                                                   | 13 y                  |                           | ELISA <sup>2</sup> , IHA <sup>2</sup>   |

|                                        |                      |        |                   |                                                                                                                                     |                     |                                             |                                       |              |
|----------------------------------------|----------------------|--------|-------------------|-------------------------------------------------------------------------------------------------------------------------------------|---------------------|---------------------------------------------|---------------------------------------|--------------|
| <i>de Oliveira, 1990</i> [68]          | Brazil               | Cohort | Children & adults | BNZ (n=50):<br>5-8 mg/kg/d for 60 days<br><br>NFTX (n=50):<br>10-15 mg/kg/d for 60-120 days                                         | 5 to 18 y           | XD                                          | CF, IF, HA                            |              |
| <i>Diniz-Marques et al., 2003</i> [56] | Brazil               | Cohort | Children          | BNZ (n=48):<br>5-10 mg/kg/d for 60 days                                                                                             | 24 mo               | Not reported                                | ELISA, IHA, IIF                       |              |
| <i>Escribà et al., 2009</i> [41]       | Honduras             | Cohort | Children          | BNZ (n=2,275):<br>5-7.5 mg/kg/d for 60days                                                                                          | 18-36 mo            | Not reported                                | ELISA <sup>2</sup>                    |              |
| <i>Yun et al., 2009</i> [45]           | Bolivia<br>Guatemala |        |                   |                                                                                                                                     | 18-60 mo &<br>36 mo |                                             |                                       |              |
| <i>Fabbro et al., 2000</i> [60]        | Argentina            | Cohort | Children & adults | BNZ (n=36):<br>5 mg/kg/d for 30 days<br><br>NFTX (n=32):<br>5-8 mg/kg/d for 60 days<br><br>Control (n=130):<br>no treatment         | 14 y (mean)         | XD                                          | DA-2ME, IHA, IIF                      |              |
| <i>Fabbro et al., 2007</i> [47]        |                      |        | Adults            | BNZ (n=27)<br><br>NFTX (n=27):<br>8-10 mg/kg/d for 45-60 days<br><br>Control (n=57)                                                 | 21 y (mean)         |                                             | DA-2ME, ELISA <sup>2</sup> , IHA, IIF |              |
| <i>Fabbro et al., 2010</i> [37]        |                      |        |                   |                                                                                                                                     |                     |                                             |                                       |              |
| <i>Fabbro et al., 2013</i> [28]        |                      |        |                   |                                                                                                                                     |                     | BNZ (n=13)<br>NFTX (n=16)<br>Control (n=37) | 23 y (mean)                           | Not reported |
| <i>Fernandes et al., 2009</i> [42]     | Brazil               | Cohort | Children & adults | BNZ (n=80):<br>5 mg/kg/d for 60 days<br><br>Control (n=50):<br>no Chagas disease                                                    | 36 mo               | HC, PCR                                     | ELISA <sup>2</sup> , IIF <sup>2</sup> |              |
| <i>Flores-Chavez et al., 2006</i> [49] | Bolivia              | Cohort | Children          | BNZ (n=35):<br>8 mg/kg/d for 60 days                                                                                                | 12 mo               | PCR, XD                                     | ELISA, ELISA for SAPA <sup>3</sup>    |              |
| <i>Galvão et al., 1993</i> [67]        | Brazil               | Cohort | Adults            | BNZ: 8-10 mg/kg/d for 30-60 days & NFTX: 5-7 mg/kg/d for 30-60 days (n=85)<br><br>Control (n=101): no treatment                     | 3-10 y              | HC                                          | CF, CoML, IIF                         |              |
| <i>Gallerano et al., 2000</i> [61]     | Argentina            | Cohort | Adults            | BNZ (n=130):<br>4-8 mg/kg/d for 45-60 days<br><br>NFTX (n=96):<br>10 mg/kg/d for 45-60 days<br><br>Control (n=668):<br>no treatment | 5,3 y               | XD                                          | IHA, IIF                              |              |
| <i>Hasslocher-Moreno, 2010</i> [38]    | Brazil               | Cohort | Adults            | BNZ (n=62):<br>5 mg/kg/for 30-60 days<br><br>Control (n=62):<br>no treatment                                                        | 140,9 mo (± 47.8)   | XD                                          | IIF <sup>2</sup>                      |              |
| <i>Jackson et al., 2013</i> [29]       | Switzerland          | Cohort | Adults            | NFTX (n=37):<br>10 mg/kg/d for 30-60 days                                                                                           | 3 y                 | PCR                                         | ELISA                                 |              |

|                                           |           |        |                   |                                                                                                                              |                   |              |                                                                                  |
|-------------------------------------------|-----------|--------|-------------------|------------------------------------------------------------------------------------------------------------------------------|-------------------|--------------|----------------------------------------------------------------------------------|
| <i>Lacunza et al., 2006</i> [50]          | Argentina | Cohort | Adults            | BNZ (n=14):<br>5 mg/kg/d for 60 days<br><br>Control (n=5):<br>no treatment                                                   | 6 mo              | PCR          | ELISA <sup>2</sup> , IHA <sup>2</sup>                                            |
| <i>Levi et al., 1971</i> [74]             | Brazil    | Cohort | Adults            | NFTX (n=12):<br>5-17 mg/kg/d for 120 days                                                                                    | 3 y               | Not reported | CF                                                                               |
| <i>Machado-de-Assis et al., 2012</i> [34] | Brazil    | Cohort | Children & adults | BNZ (n=94):<br>5 mg/kg/d for 60 days                                                                                         | 16.9 y<br>(± 6.8) | HC, PCR      | ELISA <sup>2</sup> , IHA <sup>2</sup> , IIF <sup>2</sup> , TESA-blot             |
| <i>Maekelt, 1969</i> [75]                 | Venezuela | Cohort | Adults            | NFTX (n=14):<br>5-15 mg/kg/d for 120 days                                                                                    | 10 mo             | Not reported | CF, IHA                                                                          |
| <i>Maldonado et al., 1995</i> [65]        | Paraguay  | Cohort | Children          | BNZ (n=20):<br>5-7 mg/kg/d for 60 days                                                                                       | 6 mo              | HC, PCR, XD  | ELISA, IIF                                                                       |
| <i>Vera de Bilbao et al., 2004</i> [54]   |           |        |                   | BNZ (n=12)                                                                                                                   | 24 mo             | XD           |                                                                                  |
| <i>Meira et al., 2004</i> [53]            | Brazil    | Cohort | Adults            | BNZ (n=31):<br>5 mg/kg/d for 60 days                                                                                         | 27.7 mo<br>(mean) | HC, PCR      | CoML, ELISA, IHA, IIF, rCRP<br>ELISA <sup>3</sup>                                |
| <i>Molina et al., 2014</i> [22]           | Spain     | RCT    | Adults            | BNZ (n=26):<br>150 mg twice daily for 60 days                                                                                | 10 mo             | rt-PCR       | ELISA <sup>2</sup>                                                               |
| <i>Moretti et al., 1998</i> [63]          | Argentina | Cohort | Children & adults | BNZ & NFTX (n=42). No further details were provided.<br><br>Control (n=42):<br>no treatment                                  | 2-20 y            | Not reported | HA, IF, ELISA <sup>3</sup>                                                       |
| <i>Muñoz et al., 2013</i> [31]            | Chile     | Cohort | Adults            | NFTX (n=21):<br>6 mg/kg/d for 60 days                                                                                        | 13 mo             | rt-PCR, XD   | Not reported                                                                     |
| <i>Murcia et al., 2010</i> [39]           | Spain     | Cohort | Children & adults | BNZ (n=181):<br>5-7 mg/kg/d for 60 days                                                                                      | 35 mo             | PCR          | IIF <sup>2</sup>                                                                 |
| <i>Neves da silva et al., 1974</i> [73]   | Brazil    | Cohort | Adults            | NFTX (n=15):<br>8-10 mg/kg/d for 120 days<br><br>Placebo (n=10)                                                              | 48 mo             | XD           | HA, IF                                                                           |
| <i>Pérez Ayala et al., 2011</i> [35]      | Spain     | Cohort | Adults            | BNZ (n=64):<br>5 mg/kg/d for 30-60 days                                                                                      | 1 y<br>(mean)     | PCR          | ELISA, IHA                                                                       |
| <i>Rumi et al., 2013</i> [32]             | Argentina | Cohort | Children          | BNZ (n=221):<br>5 mg/kg/d for 60 days                                                                                        | 2-5 y             | PCR          | ELISA <sup>2</sup> , IHA <sup>2</sup>                                            |
| <i>Sánchez Negrette et al., 2008</i> [46] | Argentina | Cohort | Adults            | BNZ (n=18):<br>5 mg/kg/d for 60 days                                                                                         | 24-66 mo          | Not reported | CMA-ELISA <sup>2</sup> , IRA-ELISA & RAM-ELISA <sup>2,3</sup> , IHA <sup>2</sup> |
| <i>Shenone et al., 1981</i> [70]          | Chile     | Cohort | Adults            | BNZ (n=6):<br>8-15 mg/kg/d for 30 days<br><br>NFTX (n=15):<br>5-15 mg/kg/d for 60-120 days<br><br>Placebo (n=8) for 120 days | 83 mo (mean)      | XD           | Not reported                                                                     |
| <i>Solari et al., 1998</i> [64]           | Chile     | Cohort | Children          | NFTX (n=28):<br>7 mg/kg/d for 60 days                                                                                        | 6 mo              | PCR, XD      | Not reported                                                                     |
| <i>Solari et al., 2001</i> [59]           |           |        |                   | NFTX (n=66)                                                                                                                  | 3 y               |              | ELISA, HAI                                                                       |

|                                         |           |        |          |                                                                                                                                 |                         |              |                                                              |
|-----------------------------------------|-----------|--------|----------|---------------------------------------------------------------------------------------------------------------------------------|-------------------------|--------------|--------------------------------------------------------------|
| <i>Streiger et al., 2004</i> [55]       | Argentina | Cohort | Children | BNZ (n=64):<br>5 mg/kg/for 30 days<br><br>NFTX (n=7):<br>12-15 mg/kg/d for<br>45-60 days<br><br>Control (n=24):<br>no treatment | 12 y (median)           | Not reported | DA-2ME, ELISA <sup>2</sup> ,<br>IHA, IIF                     |
| <i>Sosa-Estani et al., 1998</i> [25]    | Argentina | RCT    | Children | BNZ (n=55):<br>5 mg/kg/d for 60<br>days<br><br>Placebo (n=51)                                                                   | 4 y                     | XD           | ELISA,<br>ELISA F29 <sup>3</sup> ,<br>IHA, IIF               |
| <i>Sosa-Estani et al., 2009</i> [43]    |           | Cohort | Adults   | BNZ (n=16)                                                                                                                      | 14 y                    | PCR, XD      |                                                              |
| <i>Vera de Bilbao et al., 2006</i> [51] | Paraguay  | Cohort | Children | BNZ (n=5):<br>5-7 mg/kg/d for 60<br>days                                                                                        | 10 y                    | Micromethod  | ELISA, IIF                                                   |
| <i>Vigliano et al., 1989</i> [69]       | Argentina | Cohort | Adults   | BNZ (n=131):<br>5 mg/kg/d for 35<br>days<br><br>Control (n=70):<br>no treatment                                                 | 7.5 y (mean)            | Not reported | CF, IHA, IIF                                                 |
| <i>Viotti et al., 1994</i> [66]         | Argentina | Cohort | Adults   | BNZ (n=131):<br>5 mg/kg/d for 30<br>days<br><br>Control (n=70):<br>no treatment                                                 | 8 y (mean)              | XD           | CF, IHA, IF                                                  |
| <i>Viotti et al., 2006</i> [52]         | Argentina | Cohort | Adults   | BNZ (n=283):<br>5 mg/kg/d for 30<br>days<br><br>Control (n=283):<br>no treatment                                                | 9.8 y (mean)            | Not reported | CF, IHA, IIF                                                 |
| <i>Viotti et al., 2009</i> [44]         | Argentina | Cohort | Adults   | BNZ (n=760):<br>5 mg/kg/d for 30<br>days<br><br>Control (n=1.075):<br>no treatment                                              | 10.4 y<br>( $\pm 7.8$ ) | Not reported | ELISA, IHA or IIF                                            |
| <i>Viotti et al., 2011</i> [36]         | Argentina | Cohort | Adults   | BNZ (n=53):<br>5 mg/kg/d for 30<br>days<br><br>Control (n=89):<br>no treatment                                                  | 36 mo (mean)            | Not reported | ELISA, IHA,IIF,<br>multiplex serologic<br>assay <sup>3</sup> |
