# Supplementary material for: Course of Chronic Trypanosoma cruzi Infection after Treatment Based on Parasitological and Serological Tests: A Systematic Review of Follow-Up Studies
Source: PubMed Central journal article supplement (PMC4593559; doi:10.1371/journal.pone.0139363), 2015-10-05
Supplement: pone.0139363.s010.pdf [file pone.0139363.s010.pdf]

| Source                                      | Country   | Study groups                                                                                                                                                      | Reasons for exclusion                                                                                                                                              |
|---------------------------------------------|-----------|-------------------------------------------------------------------------------------------------------------------------------------------------------------------|--------------------------------------------------------------------------------------------------------------------------------------------------------------------|
| <i>Libonatti et al., 1979</i> [83]          | Argentina | NFTX (n=4,441): 8 mg/kg/d for 90 days up to 1976 and for 60 days onwards                                                                                          | Monograph with lack of key numerical data about follow-up of subjects                                                                                              |
| <i>Apt et al., 1986</i> [82]                | Chile     | A) BNZ (n=5): doses starting at 2 mg/kg increasing to 5 mg/kg/d by the fifth day<br><br>B) BNZ plus obioactin (n=8) for 35 days<br><br>C) Control (placebo) (n=8) | No parasitological and/or serological outcomes were reported                                                                                                       |
| <i>Carpintero, 1993</i> [81]                | Argentina | BNZ (n=2,937): 5 mg/kg/d plus tioctic acid: 20 mg/d plus magnesium lactate: 1 mg plus pyridoxine: 250 mg for 30 days                                              | Combined trypanocidal treatment                                                                                                                                    |
| <i>Guevara et al., 1994</i> [80]            | Ecuador   | BNZ (n=2): 3 mg/kg for 60 days                                                                                                                                    | Short report on the use of a simple ELISA utilizing a recombinant <i>T. cruzi</i> protein (rTc24) as antigen to monitor cure of patients with acute Chagas disease |
| <i>Neto, 1998</i> [79]                      | Brazil    |                                                                                                                                                                   | Short viewpoint of the author about treatment for Chronic <i>T. cruzi</i> infection                                                                                |
| <i>Lauria-Pires et al., 2000</i> [78]       | Brazil    | BNZ (n=17): 10 mg/kg/d for 30-60 days<br><br>NFTX (n=28): 10 mg/kg/d for 30-60 days for 20, 30 and 60 days<br><br>Control (n=46): no treatment                    | Case-control study                                                                                                                                                 |
| <i>Fernández-Villegas et al., 2001</i> [76] | Spain     | BNZ (n=46): 5 mg/kg/d for 60 days                                                                                                                                 | Only results of non-conventional serological tests were performed and reported                                                                                     |
| <i>Shenone et al., 2003</i> [77]            | Chile     | NFTX: 7-10 mg/kg/d for 30 days                                                                                                                                    | Letter to the editor                                                                                                                                               |
